# Supplementary figures and images for: Muscle-resident mesenchymal progenitors sense and repair peripheral nerve injury via the GDNF-BDNF axis
Source: eLife journal article supplement (doi:10.7554/elife.97662), 2024-06-04

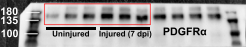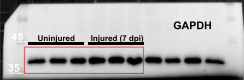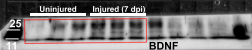

Supplement: fig5-data1 [file elife-97662-fig5-data1-v1.zip]
